# Supplementary material for: In-depth study of bio-oil and biochar production from macroalgae Sargassum sp. via slow pyrolysis
Source: Royal Society of Chemistry journal article supplement (doi:10.1039/d2ra00702a), 2022-01-01
Supplement: d2ra00702a1.pdf [file d2ra00702a1.pdf]

## **In-depth study of bio-oil and biochar production from macroalgae *Sargassum* sp. via slow-pyrolysis**

Obie FAROBIE<sup>1,2\*</sup>, Apip AMRULLAH<sup>3</sup>, Asep BAYU<sup>4</sup>, Novi SYAFTIKA<sup>5</sup>, Latifah A.  
ANIS<sup>2</sup>, Edy HARTULISTIYOSO<sup>1,2</sup>

<sup>1</sup>Department of Mechanical and Biosystem Engineering, Faculty of Agricultural Engineering and Technology, IPB University (Bogor Agricultural University), IPB Darmaga Campus, PO BOX 220, Bogor, West Java 16002, Indonesia.

<sup>2</sup>Surfactant and Bioenergy Research Center (SBRC), IPB University (Bogor Agricultural University), Jl. Pajajaran No. 1, IPB Baranangsiang Campus, Bogor, West Java 16144, Indonesia.

<sup>3</sup>Department of Mechanical Engineering, Lambung Mangkurat University, Banjarmasin, South Kalimantan, Indonesia.

<sup>4</sup>Research Center for Biotechnology, Research Organization for Life Sciences, National Research and Innovation Agency (BRIN), Jl. Raya Jakarta-Bogor KM 46 Cibinong, Bogor, West Java 16911, Indonesia.

<sup>5</sup>Center for Energy Resource and Chemical Industry Technology, Research Organization for Assessment and Application of Technology, National Research and Innovation Agency (BRIN), Kawasan Puspitek Serpong, Tangerang Selatan, Indonesia.

\*Corresponding author: [obiefarobie@apps.ipb.ac.id](mailto:obiefarobie@apps.ipb.ac.id);  
Tel: +62-812-898-11-381

**Table S1.** Chemical constituent, proximate and ultimate analysis of *Sargassum* sp.

| <b>Chemical constituent (wt%)<sup>a</sup></b> |                     |
|-----------------------------------------------|---------------------|
| Carbohydrate                                  | 53.23 ± 0.17        |
| Lipid                                         | 2.05 ± 0.04         |
| Protein                                       | 12.71 ± 0.14        |
| <b>Proximate analysis (wt%)<sup>a</sup></b>   |                     |
| Moisture content                              | 7.02 ± 0.02         |
| Ash content                                   | 46.59 ± 0.04        |
| Fixed carbon                                  | 3.84 ± 0.03         |
| Volatile matter                               | 49.57 ± 0.12        |
| <b>Ultimate analysis (wt%)<sup>b</sup></b>    |                     |
| C                                             | 42.40 ± 0.38        |
| H                                             | 5.86 ± 0.03         |
| N                                             | 2.72 ± 0.01         |
| S                                             | 2.78 ± 0.05         |
| O <sup>c</sup>                                | 46.24 ± 0.30        |
| <b>HHV (MJ kg<sup>-1</sup>)</b>               | <b>14.46 ± 0.08</b> |

<sup>a</sup> dry base

<sup>b</sup> dry ash-free

<sup>c</sup> calculated by difference, i.e., O = 100% – C – H – N – S

**Table S2.** Chemical composition identified in *Sargassum* sp. bio-oil from GC/MS

| No | Compounds                       | Molecular formula                                           | Retention time [min] | Relative area (%) |        |        |
|----|---------------------------------|-------------------------------------------------------------|----------------------|-------------------|--------|--------|
|    |                                 |                                                             |                      | 400 °C            | 500 °C | 600 °C |
| 1  | Propane                         | C <sub>3</sub> H <sub>8</sub>                               | 1.181                | 8.10              | 9.15   | 12.95  |
| 2  | Acetic acid                     | C <sub>2</sub> H <sub>4</sub> O <sub>2</sub>                | 1.459                | 11.26             | 14.04  | 13.91  |
| 3  | Propionic acid                  | C <sub>3</sub> H <sub>6</sub> O <sub>2</sub>                | 1.819                | 20.28             | 7.79   | 5.44   |
| 4  | 1-Butyne                        | C <sub>4</sub> H <sub>6</sub>                               | 2.181                | 3.40              | 3.50   | 6.62   |
| 5  | Cyclopropane                    | C <sub>3</sub> H <sub>6</sub>                               | 2.192                | n/a               | 1.60   | 3.70   |
| 6  | Acetamide                       | C <sub>2</sub> H <sub>5</sub> NO                            | 2.391                | 2.66              | 3.73   | 2.78   |
| 7  | Butylamine                      | C <sub>4</sub> H <sub>11</sub> N                            | 2.547                | 0.13              | n/a    | n/a    |
| 8  | Cyclopentanone                  | C <sub>5</sub> H <sub>8</sub> O                             | 2.615                | 0.46              | 1.01   | n/a    |
| 9  | 4-Aminopyridine                 | C <sub>5</sub> H <sub>6</sub> N <sub>2</sub>                | 2.917                | n/a               | n/a    | 4.40   |
| 10 | Pyrazine                        | C <sub>4</sub> H <sub>4</sub> N <sub>2</sub>                | 2.921                | 4.60              | 5.47   | 0.52   |
| 11 | 2-Butenoic acid                 | C <sub>4</sub> H <sub>6</sub> O <sub>2</sub>                | 3.248                | n/a               | 8.75   | 4.86   |
| 12 | Isovaleric acid                 | C <sub>5</sub> H <sub>10</sub> O <sub>2</sub>               | 3.266                | 0.71              | n/a    | n/a    |
| 13 | Butyric acid                    | C <sub>4</sub> H <sub>8</sub> O <sub>2</sub>                | 3.350                | 0.75              | 1.10   | 0.86   |
| 14 | Furfuryl alcohol                | C <sub>5</sub> H <sub>6</sub> O <sub>2</sub>                | 3.413                | 10.52             | 1.27   | 10.66  |
| 15 | Pyridine                        | C <sub>5</sub> H <sub>5</sub> N                             | 3.658                | n/a               | n/a    | 0.86   |
| 16 | 2-Cyclopenten-1-one             | C <sub>5</sub> H <sub>6</sub> O                             | 5.590                | 1.48              | 0.95   | 1.95   |
| 17 | Phenol                          | C <sub>6</sub> H <sub>6</sub> O                             | 5.950                | 4.19              | 7.76   | 8.21   |
| 18 | 2,3-Dimethyl-2-cyclopente-1-one | C <sub>7</sub> H <sub>10</sub> O                            | 7.359                | n/a               | 0.81   | 0.56   |
| 19 | <i>o</i> -Cresol                | C <sub>7</sub> H <sub>8</sub> O                             | 7.835                | n/a               | 0.57   | 1.32   |
| 20 | <i>p</i> -Cresol                | C <sub>7</sub> H <sub>8</sub> O                             | 8.427                | 0.77              | 1.18   | 1.87   |
| 21 | 3-Hydroxypyridine               | C <sub>5</sub> H <sub>5</sub> NO                            | 9.280                | 3.19              | 6.61   | 3.51   |
| 22 | Pentanamide                     | C <sub>5</sub> H <sub>11</sub> NO                           | 9.506                | n/a               | 0.82   | n/a    |
| 23 | 2-aminophenol                   | C <sub>6</sub> H <sub>7</sub> NO                            | 9.693                | n/a               | 0.93   | 0.71   |
| 24 | 2,3,5-Trimethyl-6-ethylpyrazine | C <sub>9</sub> H <sub>14</sub> N <sub>2</sub>               | 10.706               | 0.56              | n/a    | n/a    |
| 25 | 4-aminophenol                   | C <sub>6</sub> H <sub>7</sub> NO                            | 10.716               | n/a               | 0.97   | n/a    |
| 26 | 5-Hydroxymehtylfurfural         | C <sub>6</sub> H <sub>6</sub> O <sub>3</sub>                | 11.998               | 11.01             | 13.94  | 1.85   |
| 27 | Geraniol                        | C <sub>10</sub> H <sub>18</sub> O                           | 12.053               | 0.58              | n/a    | n/a    |
| 28 | 2-Imidazolidinone               | C <sub>3</sub> H <sub>6</sub> N <sub>2</sub> O              | 12.347               | n/a               | 0.54   | n/a    |
| 29 | Imidazolidine-2,4-dione         | C <sub>3</sub> H <sub>4</sub> N <sub>2</sub> O <sub>2</sub> | 14.392               | 2.72              | 1.16   | 2.76   |
| 30 | Morpholine                      | C <sub>4</sub> H <sub>9</sub> NO                            | 16.325               | 1.79              | 1.00   | 1.68   |
| 31 | Hexadecanoic acid               | C <sub>16</sub> H <sub>32</sub> O <sub>2</sub>              | 22.058               | 0.57              | n/a    | n/a    |
| 32 | 9,12-Octadecadienoic acid       | C <sub>18</sub> H <sub>32</sub> O <sub>2</sub>              | 23.322               | 1.44              | n/a    | n/a    |

**Table S3** Band assignment of FTIR spectra of biochar

| Typical band assignment  | Main peak (cm <sup>-1</sup> ) |        |        |
|--------------------------|-------------------------------|--------|--------|
|                          | 400 °C                        | 500 °C | 600 °C |
| aliphatic C-H stretching | 2860                          | 2835   | 2815   |
| C-C=C-C=C                | 2251                          | 2280   | 2286   |
| aromatic C=C stretching  | 1592                          | 1625   | n/a    |
| aliphatic C-H bending    | 1398                          | 1420   | 1422   |
| aromatic C-H stretching  | 1098                          | 1095   | 1096   |

**Table S4** BET surface area and pore characteristics of macroalgal biochar

| Sample           | BET surface area<br>[m <sup>2</sup> g <sup>-1</sup> ] | Total pore volume<br>[cm <sup>3</sup> g <sup>-1</sup> ] | Mean pore<br>diameter [nm] |
|------------------|-------------------------------------------------------|---------------------------------------------------------|----------------------------|
| Biochar (400 °C) | 4.28                                                  | 0.023                                                   | 12.20                      |
| Biochar (500 °C) | 5.43                                                  | 0.026                                                   | 11.44                      |
| Biochar (600 °C) | 5.68                                                  | 0.029                                                   | 10.83                      |

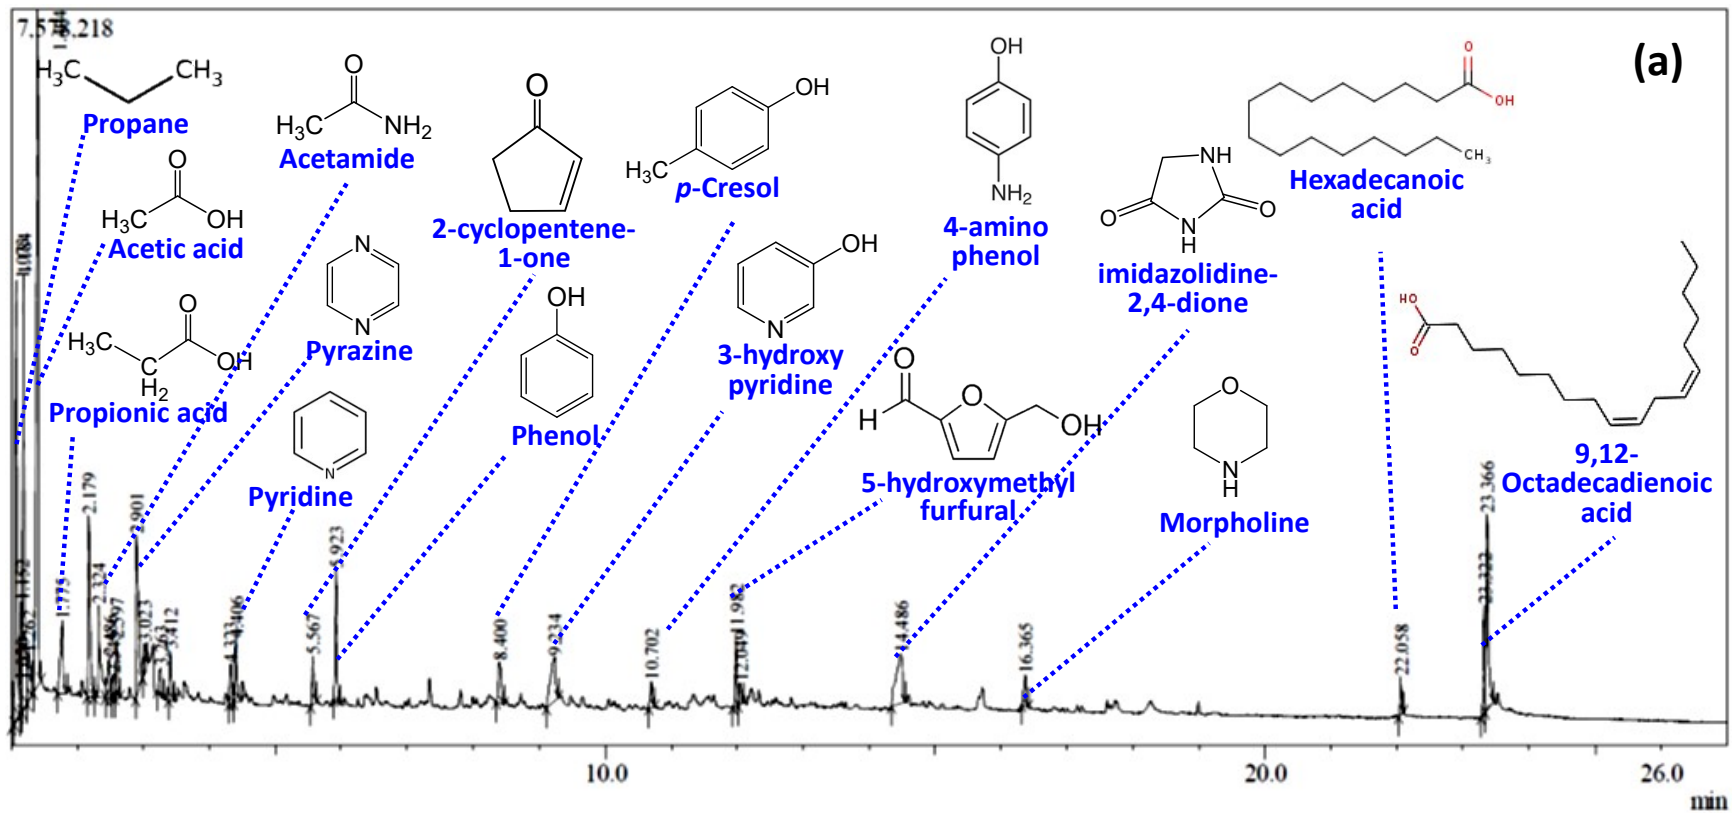

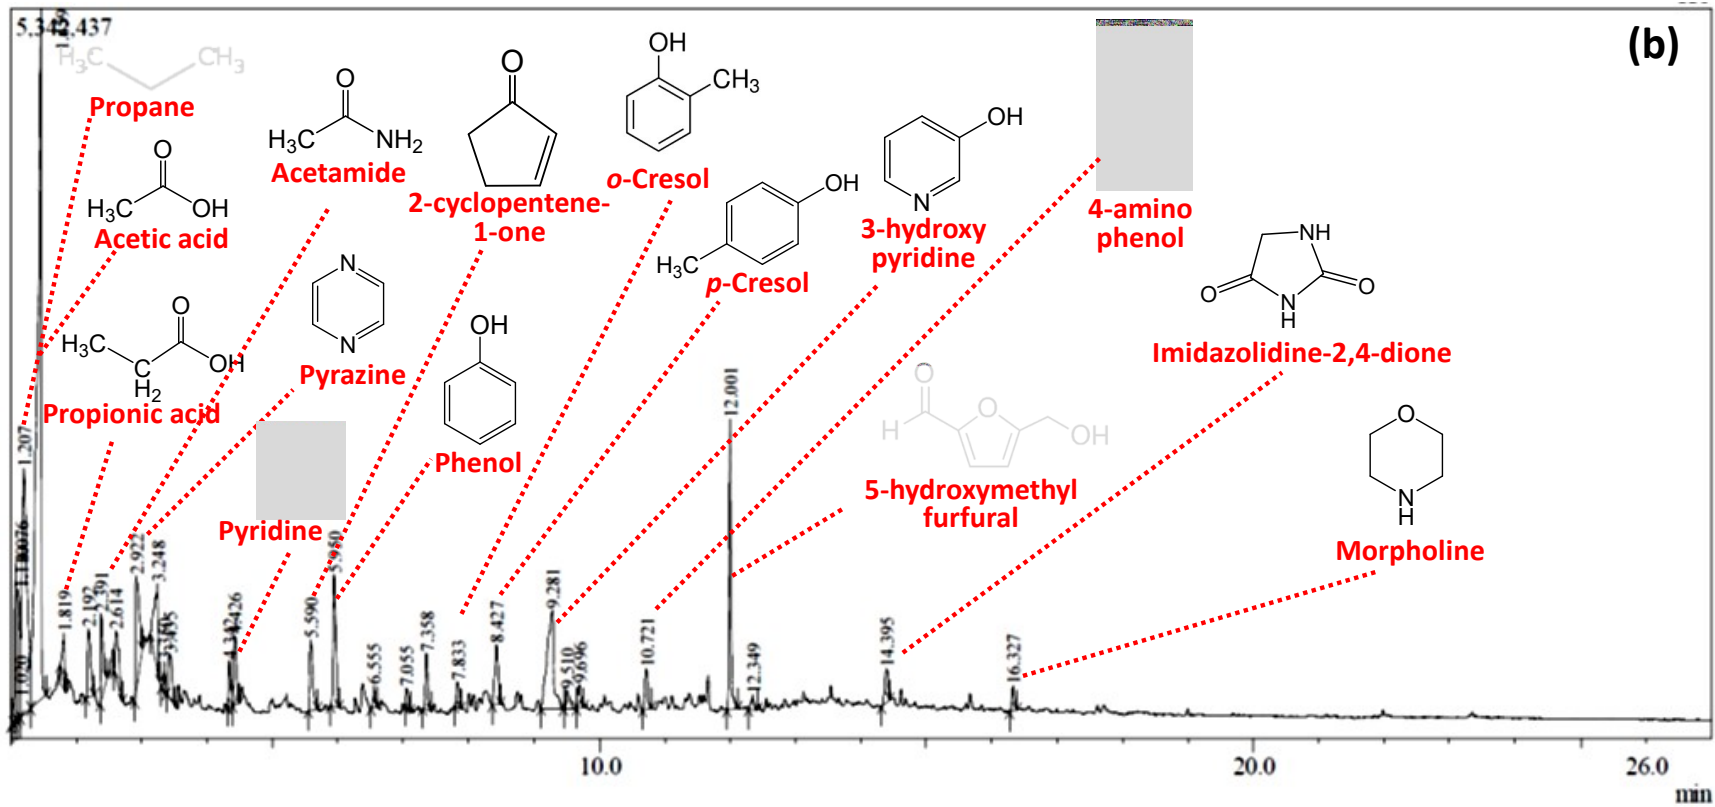

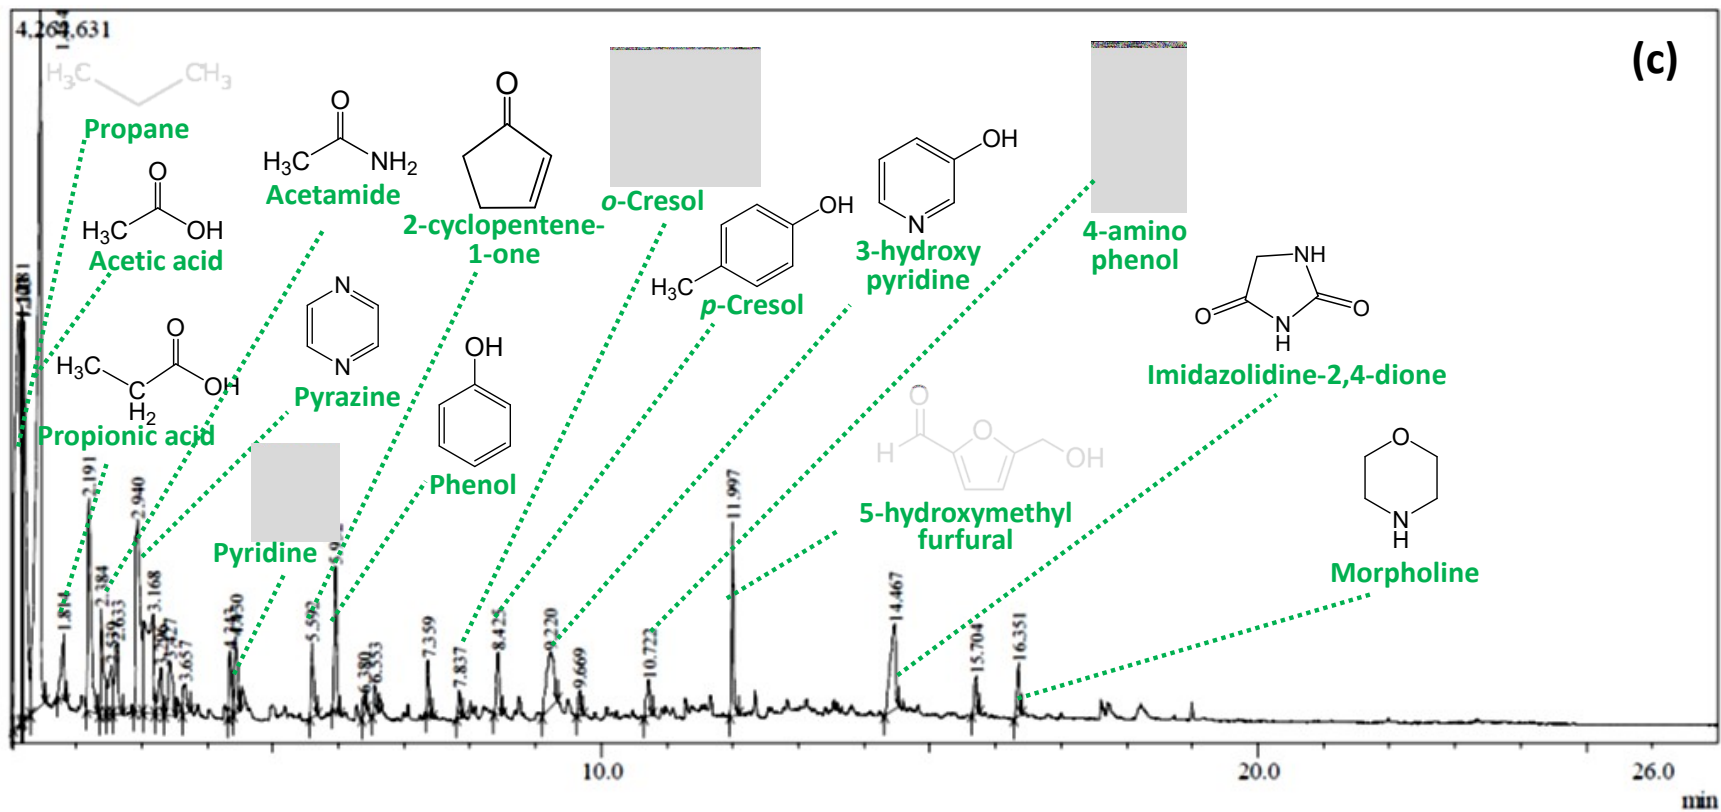

Figure S1 Typical GC/MS chromatogram of *Sargassum* sp. bio-oil at (a) 400 °C, (b) 500 °C, and (c) 600 °C.



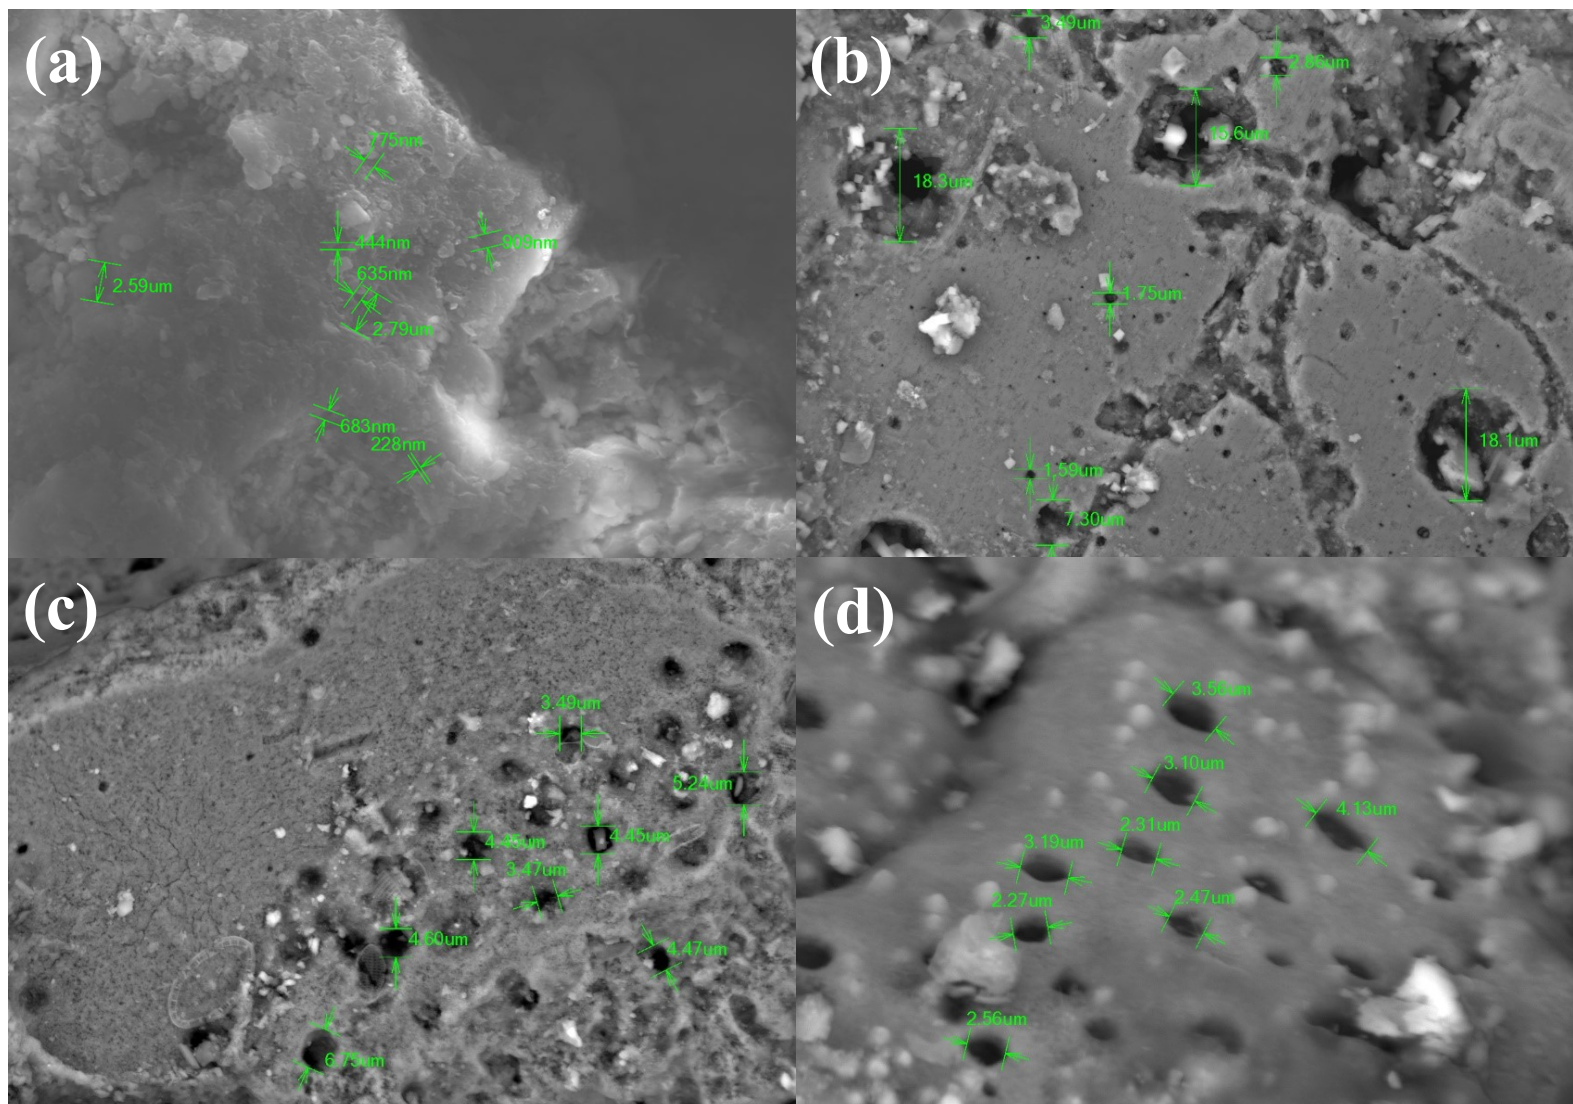

**Figure S2** The pore size of (a) untreated *Sargassum* sp.; (b) bio-char at 400 °C; (c) bio-char at 500 °C; and (d) bio-char at 600 °C.
